1       **Growth characterization and biostimulant potential of *Coelastrella* sp. D14 a**  
2 **green microalga isolated from a solar panel.**

3 Sara Baldanta<sup>1</sup>, Alice Ferreira<sup>2</sup>, Luisa Gouveia<sup>2,3</sup>, Juana Maria Navarro Llorens<sup>1</sup>, Govinda  
4 Guevara<sup>1\*</sup>

5       <sup>1</sup>Department of Biochemistry and Molecular Biology, c/Jose Antonio Novais 12,  
6 Universidad Complutense de Madrid, 28040 Madrid, Spain. [sabaldan@ucm.es](mailto:sabalдан@ucm.es);  
7 [jmnavarr@ucm.es](mailto:jmnavarr@ucm.es); [fguevara@ucm.es](mailto:fguevara@ucm.es).

8       <sup>2</sup>LNEG, National Laboratory of Energy and Geology I.P., Bioenergy Unit, Estrada do  
9 Paço do Lumiar 22, 1649-038 Lisbon, Portugal. [alice.ferreira@lneg.pt](mailto:alice.ferreira@lneg.pt);  
10 [luisa.gouveia@lneg.pt](mailto:luisa.gouveia@lneg.pt)

11       <sup>3</sup>GreenCoLab - Green Ocean Technologies and Products Collaborative Laboratory,  
12 CCMAR, University of Algarve, Campus de Gambelas, 8005-139 Faro, Portugal.

13       \*Corresponding author: [fguevara@ucm.es](mailto:fguevara@ucm.es)

14

15       **Abstract**

16 Extremophile environments are an important source for finding microorganisms with a  
17 potential for biotechnological applications. Among these microorganisms, microalgae  
18 contribute to several sustainable processes such as wastewater treatments or nutrition. In  
19 this work it was characterized a microalga isolated from a solar panel. The morphological  
20 and phylogenetic analysis revealed that the isolate collected was a *Coelastrella* strain.  
21 Cultivation and stress experiments has shown that *Coelastrella* sp. D14 can resist a long  
22 period of desiccation and it can grow on cheap sources such as piggery wastewaters  
23 (PWW). This work reports that a *Coelastrella* strain displays biostimulant properties with  
24 a germination index of 123% on *Lepidium sativum* when D14 biomass grown at 10%  
25 piggery effluent was used. Altogether, these results suggest that this novel strain could be  
26 a good chassis for further biotechnological applications.

27       **Highlights**

- 28       • *Coelastrella* sp. D14, a xero-tolerant strain, has been isolated from a solar panel  
29       • This strain can grow on piggery wastewater  
30       • *Coelastrella* sp. D14 can promote germination of *Lepidium sativum*

31

32       **Keywords:** *Coelastrella* sp. D14; microalga; extremophile; wastewater; biostimulant

33       **1. Introduction**

34       Water scarcity and pollution, recognized as significant environmental concerns,  
35 have garnered widespread attention, prompting efforts towards finding solutions (Hussain  
36 et al., 2021). Microalgae are one of the most attractive biological agents to address the

37 water pollution problems and greenhouse effect. Microalgae are a highly diversified  
38 group of photosynthetic microorganisms adapted to a wide range of ecological habitats  
39 that utilize solar energy to generate biomass. Among the advantages of its use, it stands  
40 out their low nutritional needs, not depending on arable land nor potable water, they can  
41 grow under several stresses and can be harvesting daily (Rizwan et al., 2018; Tang et al.,  
42 2020). Additionally, various microalgal species have demonstrated the ability to thrive in  
43 municipal and/or industrial wastewaters, effectively eliminating organic carbon, nitrogen,  
44 and phosphorus, while fixing CO<sub>2</sub>. Moreover, many industries used microalgal feedstocks  
45 to get high-value co-products from the biomass such as antioxidants, lipids, vitamins,  
46 pigments, or carbohydrates besides biofuel to improve the economics (Sudhakar et al.,  
47 2019; Nayana et al., 2022).

48 Microalgal growth depends on both chemical and physical factors such as the type  
49 and concentration of carbon sources and minerals present in the medium, light intensity  
50 and regime (dark/light), pH, agitation, or temperature (Singh et al., 2015). For instance, a  
51 shortage in nitrogen or phosphorus alters the biochemical composition of the microalgae  
52 but also causes a drop in the growth rate (Procházková et al., 2014). Similarly, physical  
53 parameters affect the biomass production depending on the microbial species (Daneshvar  
54 et al., 2021; Elisabeth et al., 2021; Khanra et al., 2021). The ability of microalgae to  
55 acclimate to demanding wastewater conditions and endure oxidative stress particular to  
56 these environments differ among species. However, minimizing the cost of biomass  
57 production must be considered, and therefore, an equilibrium between growth and the use  
58 of cheap media must be reached. This strategy allows both i) wastewater remediation by  
59 recovering nutrients and removing pollutants from the environment and ii) the use of the  
60 biomass produced for different applications such as biofertilizers, bioplastics, cosmetics  
61 or ingredients in functional foods and feeds (Ferreira et al., 2017; Posadas et al., 2017;  
62 Ferreira et al., 2018; García et al., 2018; Ferreira et al., 2019; Viegas et al., 2021).

63 The utilization of biofertilizers and biostimulants as a natural product is particularly  
64 crucial to avoid the use of chemicals that may lead to environmental contamination,  
65 namely in soil, water and affect the quality of the food produced. Numerous efforts are  
66 being made to expand the application of these natural biostimulants (Navarro-López et  
67 al., 2020; González-Pérez et al., 2021; Sánchez-Quintero et al., 2023) under strict  
68 legislations and regulations that depends on the continent (Su et al., 2023). The use of  
69 microalgae as biostimulants has acquired importance for their role in the sustainability  
70 and circular bioeconomy agenda (Ajeng et al., 2022; Sánchez-Quintero et al., 2023). This  
71 is because they are capable of sequestering CO<sub>2</sub>, they can survive in challenging  
72 environments such as waste effluents and and their easier cultivation compared to  
73 macroalgae (Sánchez-Quintero et al., 2023).

74 The genus *Coelastrella* (Chlorophyta phylum, Sphaeropleales order,  
75 Scenedesmaceae family) are green microalga with reported applications for  
76 bioremediation and value-added products such as UV-protective compounds among  
77 others (Zaytseva et al., 2021). *Coelastrella* is also a better renewable energy resource  
78 feedstock with a total of 18% of their biomass made up of lipids beneficial for biodiesel  
79 conversion (Nayana et al., 2022). This genus is mainly unicellular, ellipsoidal cells with

80 a peculiar apical wart-like wall thickenings (John, 2002; Wang et al., 2019; Goecke et al.,  
81 2020; Maltsev et al., 2021). It can be often found in subaerial and terrestrial habitats, and  
82 it is universally distributed from the arctic boreal zone to tropical zones (Nayana et al.,  
83 2022). The strains isolated from extremophilic environments display unique properties  
84 for biotechnological applications as bioprospection of extremophiles have discovered  
85 strains with high resistance to various stresses such as withstanding extreme dehydration,  
86 salt stress, and high light exposure. Some examples are: *Coelastrrella thermophila* var.  
87 globulina isolated from an algerian hot spring produces n-6 and n-3 polyunsaturated fatty  
88 acid of commercial interest (Boutarfa et al., 2022); *Coelastrrella terrestris* collected from  
89 red mucilage in a glacier foreland in Iceland is proposed for biotechnological  
90 adonixanthin production (Doppler et al., 2022); a *Coelastrrella* sp. isolated from an  
91 ammonia-rich environment could process piggery wastewater while using its biomass for  
92 other purposes such as biodiesel (Lee et al., 2021).

93 One of these extreme environments of interest are solar panels, an extreme habitat  
94 subjected to different stresses, such as high irradiation, temperature fluctuations, and  
95 desiccation (Dorado-Morales et al., 2016; Porcar et al., 2018; Tanner et al., 2018). The  
96 present work describes the identification and characterization of a *Coelastrrella* sp. D14  
97 strain from an extreme environment, a solar panel. The biotechnological potential of this  
98 novel strain was evaluated: D14 resists long periods of desiccation, it can grow on cheap  
99 sources such as piggery wastewaters (PWW), and for the first time this work reports that  
100 a *Coelastrrella* xerotolerant strain can be used as a biostimulant.

101

## 102 2. Material and Methods

### 103 2.1. Strain isolation and culture conditions

104 The microalga used in this study, *Coelastrrella* sp. D14, was isolated from a solar panel in  
105 Valencia (Spain) (Baldanta et al., 2023). *Coelastrrella* sp. D14 was grown in BG11  
106 medium on 1.5% agar plates or liquid medium at  $30^{\circ}\text{C} \pm 2^{\circ}\text{C}$  under  $100 \mu\text{E}\cdot\text{m}^{-2}\cdot\text{s}^{-1}$  of  
107 continuous white light, under orbital shaking (150 rpm). The BG11 medium contained  
108 1.5 g/L  $\text{NaNO}_3$ ; 0.02 g/L  $\text{Na}_2\text{CO}_3$ ; 0.03 g/L  $\text{K}_2\text{HPO}_4$ ; 0.075  $\text{MgSO}_4 \cdot 7 \text{H}_2\text{O}$ ; 0.036 g/L  
109  $\text{CaCl}_2 \cdot 2 \text{H}_2\text{O}$ ; 1 g/L  $\text{Na}_2\text{EDTA} \cdot 2 \text{H}_2\text{O}$ ; 1.81 g/L  $\text{MnCl}_2 \cdot 4 \text{H}_2\text{O}$ ; 0.05 g/L  $\text{CoCl}_2 \cdot 6$   
110  $\text{H}_2\text{O}$ ; 0.039 g/L  $\text{Na}_2\text{MoO}_4 \cdot \text{H}_2\text{O}$ ; 0.08 g/L  $\text{CuSO}_4 \cdot 5 \text{H}_2\text{O}$ ; 0.22 g/L  $\text{ZnSO}_4 \cdot 7 \text{H}_2\text{O}$ ; 2.86  
111 g/L  $\text{H}_3\text{BO}_3$ ; 6 g/L citric acid and 6 g/L ferric ammonium citrate (PhytotechLabs) (Rippka  
112 et al., 1979). BG11 medium was buffered to pH 7.5 with 10 mM HEPES. The cultured  
113 algal cells were observed and photographed under a microscope (Leica, model DM750).  
114 Axenic strains were stored at  $-80^{\circ}\text{C}$  in BG11 medium supplemented with 5% (v/v)  
115 DMSO.

116 Cultures of *Coelastrrella* sp. D14 were harvested at different growth phases and  
117 preparations of these cultures were photographed and then processed by the LAS V4.2  
118 software. ImageJ software was used to measure the cell size.

### 119 2.2. Molecular identification and Phylogenetic analysis

120 *Coelastrrella* sp. D14 was previously identified using primers for 18rRNA  
121 amplification (18S-Fw 5'-GTCAGAGGTGAAATTCTTGATTTA-3', 18S-Rv 5'-  
122 AGGGCAGGGACGTAATCAACG-3') (Baldanta et al., 2023). The 18S rRNA gene  
123 sequence of *Coelastrrella* sp. D14 (PP158241) was searched against homology sequences  
124 in Genbank using BLAST (<http://blast.ncbi.nlm.nih.gov>). 18S rRNA gene sequence from  
125 the identified *Coelastrrella* sp. D14 and the top BLAST sequences were used for  
126 phylogenetic analysis. Multiple sequence alignments were performed using MUSCLE  
127 algorithm in MEGA-X. A neighbor-joining phylogenetic tree was built with the aligned  
128 sequences based on the K2+G+I model with a bootstrap analysis involving 1000  
129 resampling trees using MEGA-X package. *Dunaliella salina* 18S rRNA was used as  
130 outgroup.

131

### 132 **2.3. Autotrophic growth**

133 Axenic *Coelastrrella* sp. D14 was inoculated into 20 mL of BG11 medium in 100 mL  
134 Erlenmeyer flasks to an initial optical density at 750 nm ( $OD_{750nm}$ ) of 0.05 and grown at  
135 different salinity conditions, pH, or nitrogen sources. To assess growth at different salt  
136 concentrations, BG11 medium was prepared containing 0.1, 0.25, 0.5, or 1 M of NaCl.  
137 The influence of pH on cyanobacterial growth was explored in BG11 buffered to pH 4,  
138 6.5, 9, and 11 with 10 mM Tris adjusted to each pH. To examine the strains for growth  
139 on different nitrogen sources, BG11 was modified by replacing the 16 mM of  $NaNO_3$   
140 with 16 mM of  $NH_4Cl$  or urea. Tolerance to urea was determined by adding this  
141 compound to final concentrations of 8 and 16 mM to BG11. For temperature experiment  
142 tests, 100 mL Erlenmeyer flasks with an initial  $OD_{750nm}$  of 0.20 were used. As a control,  
143 strains grown under routine conditions (BG11 pH 7.5, 30°C, 150 rpm, and continuous  
144 light  $100 \mu E \cdot m^{-2} \cdot s^{-1}$ ) were used. The temperature effect on growth was evaluated at 4, 40,  
145 and 50°C, using 30°C as control keeping the other conditions constant. Cell growth was  
146 monitored by measuring the  $OD_{750nm}$  for a 10-day period. In all the growth experiments,  
147 three biological replicates were performed. To define the relationship between cell  
148 density per unit OD at 750 nm wavelength, a hemocytometer was used to count the cells.  
149 Growth rate was determined by plotting the log OD versus time and calculating the slope  
150 in the linear portion, related to the exponential growth. The beginning of the growth phase  
151 was considered when the growth of the cyanobacteria was appreciable. Doubling time  
152 corresponds to the  $\log 2/r$ . In addition, the biomass dry weight and the ash free dry weight  
153 (AFDW) were determined through gravimetry by drying the samples at 105°C overnight  
154 and incinerating at 550°C for 1 h, respectively.

155

### 156 **2.4. Heterotrophic and Mixotrophic Growth**

157 First, to assess the heterotrophic growth of *Coelastrrella* sp. D14, BG11 agar plates  
158 were prepared at final concentrations of 10 mM with different carbon sources: glucose,  
159 sucrose, lactose, arabinose, maltose, fructose, galactose, mannose, and glycerol. The tests

160 were performed with spots of 10  $\mu\text{L}$  at  $\text{OD}_{750\text{nm}}=1$  onto BG11 plates to reduce the  
161 possibility of contamination. Plates were incubated at  $30^\circ\text{C}$  in darkness for 30 days.  
162 Furthermore, the photosynthesis inhibitor DCMU (3-(3,4-dichlorophenyl)-1,1-  
163 dimethylurea) was added for a final concentration of 10  $\mu\text{M}$  to make sure that the  
164 observed growth was heterotrophic. The cell growth was evaluated by checking the  
165 appearance of colonies after the incubation period.

166 Once the sugars were determined for *Coelastrella* sp. D14 cultivation, the  
167 heterotrophic and mixotrophic growth were evaluated in liquid medium. Axenic  
168 *Coelastrella* sp. D14 was inoculated into 20 mL of BG11 medium in 100 mL Erlenmeyer  
169 flasks to an initial optical density at 750 nm ( $\text{OD}_{750\text{nm}}$ ) of 0.3 and grown in light conditions  
170 with no sugar, and glucose or mannose at 10 mM (mixotrophic growth). In parallel, the  
171 same conditions were used adding the photosynthesis inhibitor DCMU at 10  $\mu\text{M}$   
172 (heterotrophic growth). Cell growth was monitored by measuring the  $\text{OD}_{750\text{nm}}$  for a 7-day  
173 period. In all the growth experiments, three biological replicates were performed.  
174 Cultures were checked to ensure that they were free of contaminant bacteria before the  
175 experiments.

## 176 **2.5. Desiccation-Tolerance Test**

177 Microalgae strain was grown on 9–10 mL of BG11 agar plates (6 cm diameter) under  
178 continuous light ( $60\text{--}80 \mu\text{E}\cdot\text{m}^{-2}\cdot\text{s}^{-1}$ ) at  $30^\circ\text{C}$  for 2 weeks at 30–35% relative humidity.  
179 Then, plates were left to be air-dried under routine growth conditions by removing the  
180 parafilm from the Petri dishes. After about 15 days, dried cultures were stored in the  
181 laboratory bench at room temperature for 3 months, 7 months, and 1 year. For the 1-year  
182 dried samples, some samples were maintained in parallel under routine growth  
183 conditions. For rehydration, the dried samples were soaked with 1 mL of sterile water for  
184 15 min at room light, streaked on BG11 plates, and incubated under the same initial  
185 conditions ( $60\text{--}80 \mu\text{E}\cdot\text{m}^{-2}\cdot\text{s}^{-1}$  and  $30^\circ\text{C}$ ). Results were observed after 2–3 weeks. As a  
186 negative control for desiccation tolerance, *Synechocystis* sp. PCC 6803 was used.

187

## 188 **2.6. Wastewater treatment and biomass production**

### 189 **2.6.1. Wastewater characterization**

190 The piggery wastewater (PWW) was collected from a stabilization pond in a local pig  
191 farm from Valorgado in Herdade do Pessegueiro ( $39^\circ00009.000 \text{ N}$ ,  $8^\circ38045.500 \text{ W}$ )  
192 (Glória do Ribatejo, Portugal). This effluent corresponds to the liquid fraction of pig  
193 slurry after separation (sieve 1-10mm) from solid manure. The nutrient composition of  
194 PWW was determined by standard methods. The Kjeldahl nitrogen (TKN) was  
195 determined by a modified Kjeldahl method adapted from the standard method 4500-Norg  
196 B (Clesceri et al., 1988). Ammonium nitrogen was quantified by titration after a  
197 distillation step based on standard methods 4500-NH 3 B and C (Clesceri et al., 1988). A  
198 commercial kit was used for the measurement of phosphorus (Phosver 3-Powder Pillows,  
199 Cat. 2125-99, HACH) using a HACH DR/2010 spectrophotometer, at 890 nm. COD

200 determination was carried out according to the open reflux method—Method 5220-B.  
201 The effluent composition is shown in Table 1.

202 **Table 1.** Composition of piggery wastewater: pH, total Kjeldahl nitrogen (TKN),  
203 ammonia (NH<sub>4</sub><sup>+</sup>), phosphate (PO<sub>4</sub><sup>3-</sup>), and chemical oxygen demand (COD).

| pH   | TKN (mg N/L) | NH <sub>4</sub> <sup>+</sup> (mg/L) | PO <sub>4</sub> <sup>3-</sup> (mg/L) | COD (mg O <sub>2</sub> /L) |
|------|--------------|-------------------------------------|--------------------------------------|----------------------------|
| 7.72 | 1333±6       | 1281±1.4                            | 218±5                                | 4396±94                    |

204

## 205 **2.6.2. Microalga screening**

206 A *screening* was carried out to determine if D14 was able to grow in PWW. 50 mL flasks  
207 were inoculated using 20 mL with different dilutions (1:20, 1:10, 1:5, and 1:2.5) of PWW  
208 with tap water as the cultivation medium and were kept at room temperature, under at  
209 light intensity of 41 μE·m<sup>-2</sup>·s<sup>-1</sup>, and orbital agitation at 150 rpm in an incubator shaker  
210 (New Brunswick Scientific Co, USA).

211

## 212 **2.6.3. Biomass production**

213 To obtain biomass, the microalga cultures were cultivated in 1 L bubble columns  
214 photobioreactors (PBRs) using 1:20 (PWW) or BG11 as medium. The cultures were  
215 maintained at room temperature (23-25°C) under continuous illumination at an average  
216 light intensity of 60 μE·m<sup>-2</sup>·s<sup>-1</sup>. The aeration was supplied at 0.15 vvm (air volume (L)  
217 per volume of culture medium (L) per minute (m) from aquarium pumps.

218 The microalga cultures were cultivated in 5 L bubble columns photobioreactors (PBRs)  
219 using the same 1:20 and 1:10 PWW as medium, at a working volume of 1 L. The cultures  
220 were at room temperature (23-25°C) under continuous illumination (3 fluorescent lamps  
221 of 36 W and 6 of 18 W, Philips TL-D) at an average light intensity of 53 μE·m<sup>-2</sup>·s<sup>-1</sup>. The  
222 aeration was supplied at 0.15 vvm (air volume (L) per volume of culture medium (L) per  
223 minute (m) using aquarium pumps. After 9 days of cultivation the biomass was collected  
224 by centrifugation (10.000×g, 10 min).

225

## 226 **2.7. Biomass characterization**

227 The biochemical composition of the microalgal biomass was determined in terms of  
228 proteins, carbohydrates, lipids, moisture, and ash. All analyses were performed in  
229 triplicate. The protein content was determined following the method described by  
230 (González López et al., 2010), which is a modification of the Lowry method, with BSA  
231 (Bovine serum albumin) as the standard. The sugar content was determined by the phenol-  
232 sulfuric method (Dubois et al., 1956) after quantitative acid hydrolysis (Hoebler et al.,  
233 1989) of the biomass. A calibration curve was prepared using standard glucose solutions.  
234 Lipid content was determined gravimetrically after Soxhlet extraction with n-hexane  
235 during 6h, using biomass previously submitted to bead milling (Retsch MM400, 25 Hz  
236 for 3 min and 50 seconds).

## 237 2.8. Germination Index

238 The biostimulant activity of the microalga *Coestrella* sp. D14 was determined by  
 239 measuring the germination index of seeds of *Lepidium sativum*, according to the method  
 240 described by (Zucconi et al., 1981).

241 Microalga culture (whole biomass) and extracts obtained from the growth at different  
 242 conditions (BG11, 5%, 10%, and 20% PWW) were tested at different concentrations (0.1,  
 243 0.5, 1, and 2 g/L). Microalga extracts were prepared by submitting the harvested biomass  
 244 to high-pressure homogenization (1200 bar for 1 cycle) to disrupt the cells (Ferreira et al.,  
 245 2022). Treatment solutions with microalga culture and extracts were then prepared with  
 246 distilled water to the desired concentrations. A total of 32 treatments were tested (Fig. 1).

247 The germination experiments were carried out in sterilized rectangular Petri dishes (10  
 248 mm x 17 mm) with Whatman No 5 filter papers wetted with 7 mL of each treatment  
 249 solution, with 10 seeds per dish in duplicates. Distilled water was used as the negative  
 250 control. All samples were incubated at room temperature (25 °C) in the dark for 3 days  
 251 and the Petri dishes in a vertical position. At the end of 3 days, the seedlings were  
 252 photographed and measured with the program ImageJ (Rasband, 1997). Results were  
 253 registered for comparison between the microalga treatments and the control with distilled  
 254 water.

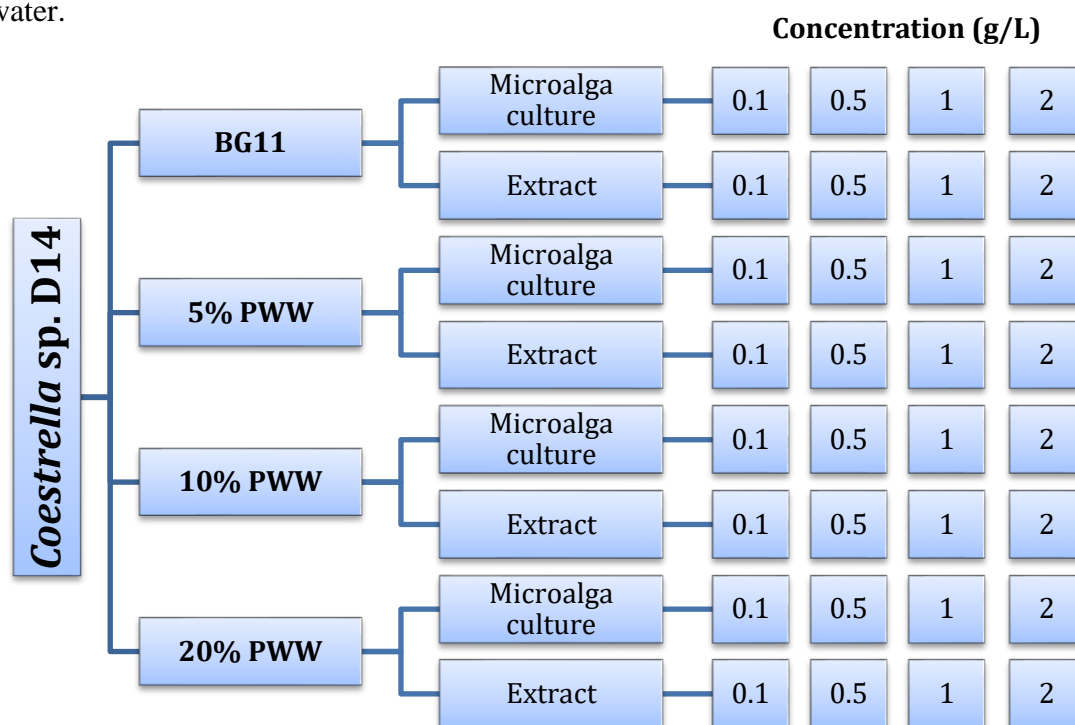

255

256 **Fig. 1. Schematic diagram of the treatments of *Coestrella* sp. D14 tested in the**  
 257 **germination trials.** Different growth media (BG11, 5, 10, and 20% PWW), different  
 258 biomass processing (microalga culture and extract from disrupted biomass), and different  
 259 treatment concentrations (0.1, 0.5, 1, and 2 g/L) were tested.

260 Finally, the germination index was determined by the Equation (1), where G and L are  
 261 the number of germinated seeds and their length in the case of the microalgal cultures and  
 262 Gw and Lw are the same parameters but in the control (distilled water). The data shown

263 in the germination index experiments is, therefore, the result of the measurement of 100  
264 seeds for each treatment.

265 
$$GI (\%) = \frac{G \times L}{G_w \times L_w} \times 100 \quad (1)$$

266

## 267 **2.9. Statistical Analyses**

268 One-way Anova with post-hoc Tukey HSD, with Scheffé, Bonferroni and Holm multiple  
269 comparison results were calculated in the different conditions studied in this work  
270 on [Astatsa.com](https://astatsa.com/) (<https://astatsa.com/>; [Vasavada, 2016](#)). Correlation was considered  
271 statistically significant when  $p < 0.05$ .

272



### 273 3. Results

#### 274 3.1. Isolation and identification of *Coelastrella* sp. D14

275 Solar panel samples were collected during the summertime of 2013 and 2014 for  
276 screening cyanobacteria and microalgae. The first isolation was made in Castenholz-D  
277 medium (Baldanta et al., 2023) and afterwards, microalgae and cyanobacteria were  
278 maintained growing on BG11. At this time, a consortium among microorganisms,  
279 bacteria and cyanobacteria/microalgae, was evident on BG11 plates. After several  
280 streaks, different strains were isolated (Baldanta et al., 2023). One of these strains, a  
281 unicellular green microalga, named D14, was identified by PCR 18S rRNA amplification  
282 reaching a homology of 99% with other *Coelastrella* strains.

283 A phylogenetic analysis based on the 18S rRNA gene sequence and a comparison to  
284 similar strains in the GenBank database indicated that the D14 had a high similarity with  
285 other strain sequences of *Coelastrella* (Fig. 2).

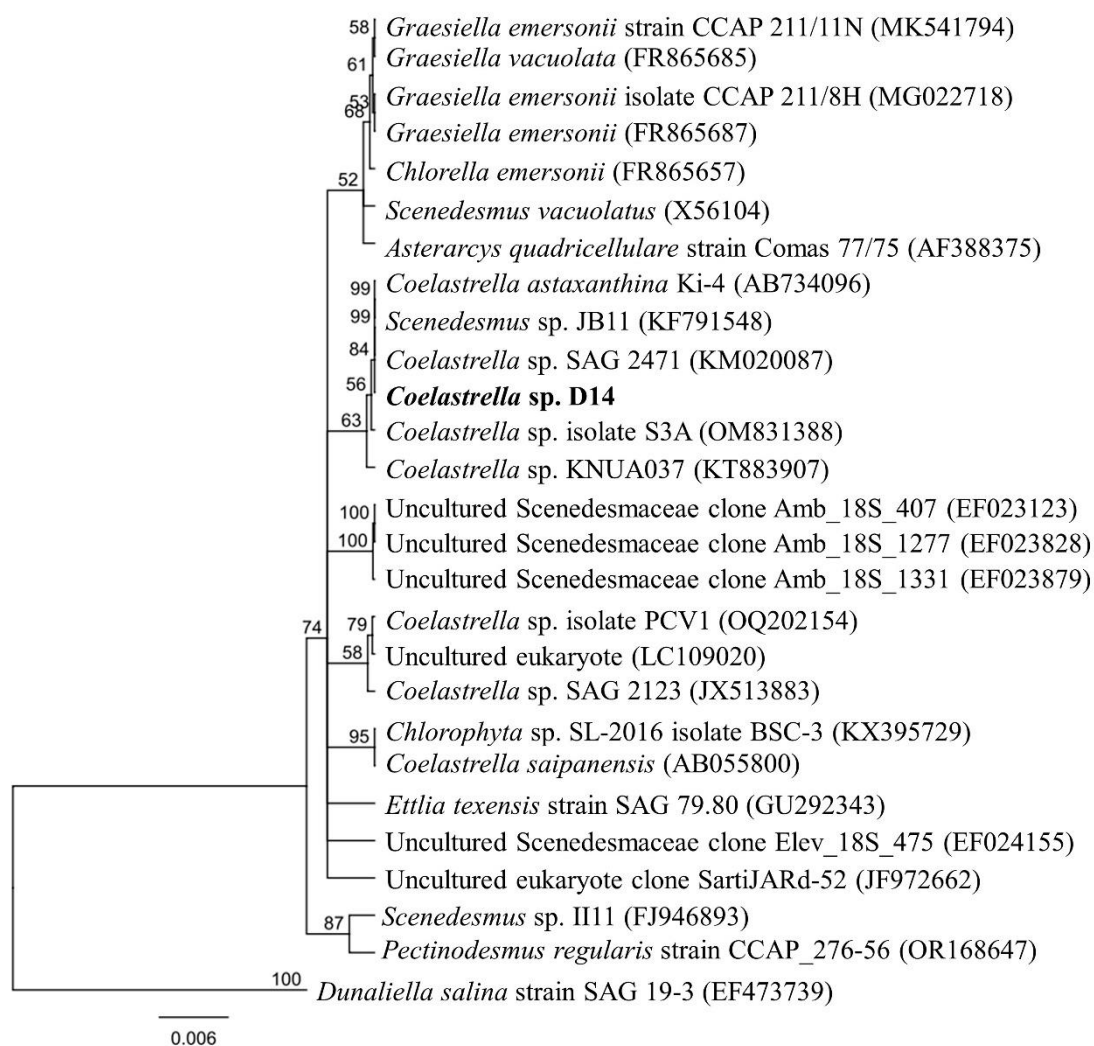

286 **Fig. 2. Phylogenetic tree inferred from 18S rRNA gene sequence from *Coelastrella***  
287 **sp. D14 isolated from the solar panel.** The tree was constructed using the neighbor-

288 joining method in MEGA-X. The length of the scale bar indicates 0.006 substitutions per  
289 site. The percentages of bootstrap support of branches (>50%) are indicated at each node.  
290 The numbers in the parenthesis are the accession numbers of respective 18S rRNA gene  
291 sequences obtained from Genbank. *Coelastrella* sp. D14 is shown in bold.

292

293 Streaked microalgal colonies on agar plate, and microscopic observation is shown in  
294 Fig. 3 (A-H). Light microscopical observations showed that *Coelastrella* sp. D14 was  
295 unicellular green coccoid microalgae. The cells showed usually as single oval cells, but a  
296 large degree of variation in cell sizes was observed ranging between 4.2 to 14.8  $\mu\text{m}$ , with  
297 a mean diameter of  $8.68 \pm 1.96 \mu\text{m}$ . Single cells are smaller, have a lemon-shaped after  
298 division, have a thin wall, and the pyrenoid is clearly noted. Also, in some of them, wart-  
299 like wall thickenings are observed (Fig. 3E). As the culture grew, the cells appeared round  
300 shaped and formed small groups of 2-6 cells. Fig. 3G shows 2-3 daughter cells after cell  
301 division with the cell wall of the mother cell surrounding the new cells. In mature cells,  
302 the chloroplast is dissected into blades.

303

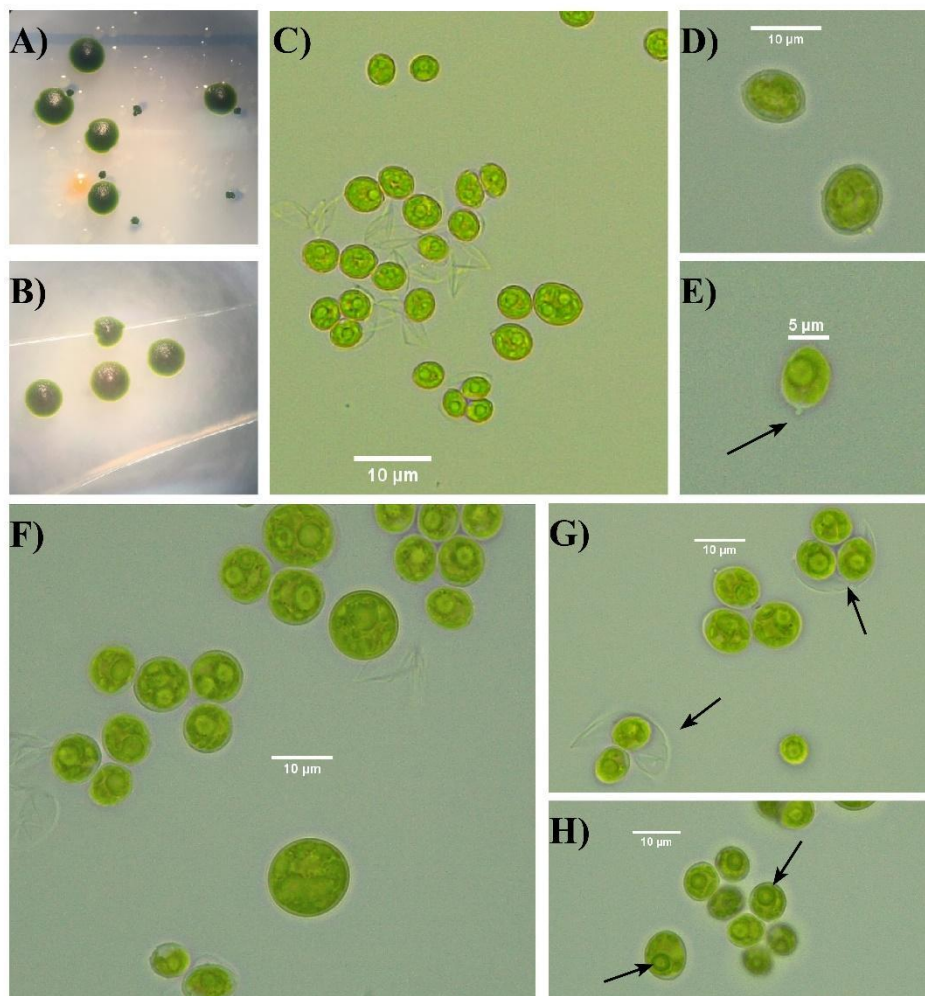

304 **Fig. 3. Isolation of *Coelastrella* sp. D14.** A) Streak colonies from the original  
305 consortium microalgae-bacteria. B) Streak colonies from the axenic microalgae. D-H)

306 Bright-field photomicrographs of *Coelastrella* sp. D14 on different days of culture. Scale  
307 bar is shown in all the pictures. D and E, lemon-shaped cells, arrow indicates a wart-like  
308 wall thickening. F, mature and round-shaped cells. G and H, cells after division. In G  
309 arrows indicate the cell wall of the mother cell and in H, the pyrenoids are pointed.

310

### 311 3.2. Autotrophic growth conditions for *Coelastrella* sp. D14

312 The growth evolution of *Coelastrella* sp. D14 in BG11 medium (pH 7.5) within 10  
313 days at 30°C under  $100 \mu\text{E}\cdot\text{m}^{-2}\cdot\text{s}^{-1}$  were studied (Fig. 4, Table S1). A mild lag phase of  
314 two days was observed and then, the microalgae reached  $2.60 \pm 0.01$  days of doubling  
315 time. The calculated correlation between the  $\text{OD}_{750\text{nm}}$  and cells per mL was:  $\text{N}^{\circ}\text{cells/mL}$   
316  $= 3.191 \cdot 10^6 \text{OD}_{750}$  ( $R^2 = 0.99$ ). In addition, the correlation of the biomass dry weight  
317 with  $\text{OD}_{750\text{nm}}$  was determined through gravimetry (Dry weight  $= 0.5314 \cdot \text{OD}_{750} - 0.0127$ ;  
318  $R^2 = 0.99$ ). After 10 days of growth in BG11, a total of 2.53 g/L of *Coelastrella* sp. D14  
319 biomass was obtained.

320

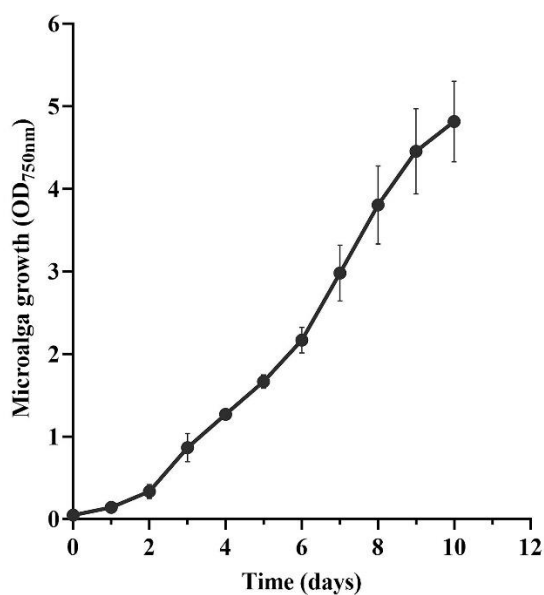

321

322 **Fig. 4. Growth curve of *Coelastrella* sp. D14 in BG11.** Average  $\text{OD}_{750\text{nm}}$  of three  
323 biological replicates together with the standard deviation.

324

325 Regarding salt stress, *Coelastrella* sp. D14 grew up to 0.5 M of NaCl (Fig. 5A). The  
326 growth was slightly affected at 0.1 M and 0.25 M of NaCl, as the statistical analysis  
327 revealed (Table S1). At 0.5 M of NaCl, the lag phase was 3 days longer and the maximal  
328 OD was lower compared to control. However, the doubling time was comparable to the  
329 control. No growth was observed at 1 M NaCl.

330

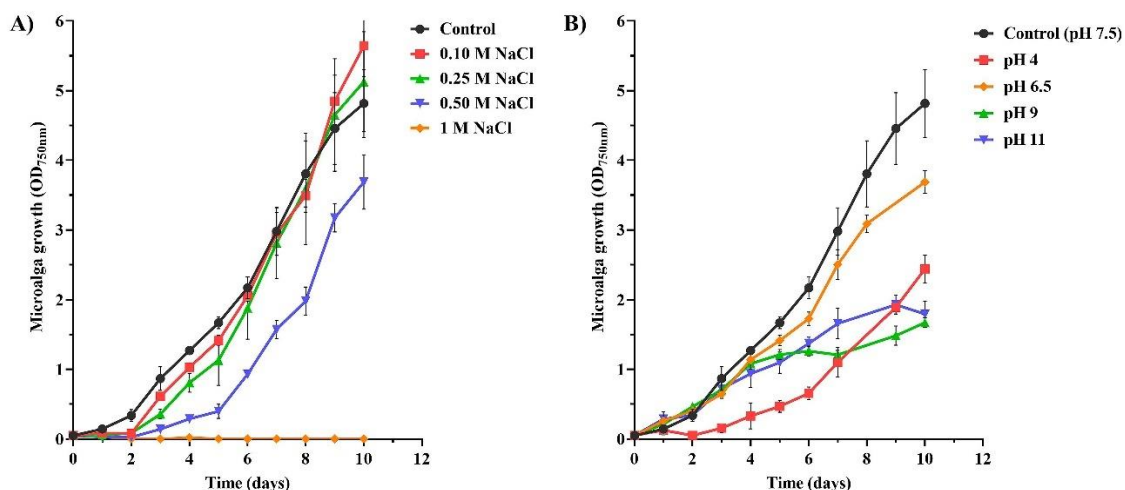

331

332 **Fig. 5. Growth characterization of *Coelastrella sp. D14* in different conditions. A)**

333 Effect of NaCl concentration on microalgae growth. As a control, growth in BG11  
334 medium was used. **B)** Effect of pH on microalga growth. BG11 buffered with 10mM Tris  
335 pH 4, pH 6.5, pH 9, and pH 11 was used instead of 10 mM HEPES at pH 7.5 (control).  
336 In all cases, the graphs show the average OD<sub>750nm</sub> of three biological replicates together  
337 with the standard deviation (n=3).

338

339 The best pH to grow *Coelastrella sp. D14* was 7.5 (control) as it is shown in Fig. 5B.  
340 non-statistical differences were observed in the doubling time for pH 6.5 when compared  
341 to the control; however, a lower growth was reached after 10 days. Interestingly,  
342 *Coelastrella sp. D14* grown at pH 4 despite having an extended lag phase, the doubling  
343 time was similar to that calculated for pH 7.5, after 5 days of grown. On the other hand,  
344 the microalga was able to tolerate a pH 9 and 11, with a statistically significant higher  
345 doubling time and reaching a lower OD than the control (5.91 and 3.39 days, respectively  
346 vs. 2.57 days at pH 7.5, Table S1). The results demonstrate that *Coelastrella sp. D14* is  
347 pH broadly resistant (from 4 to 11). More specifically, in those cultures, the final pH was  
348 ~6.3 and ~9.5, respectively and the cultures remained green after the experiment (Fig.  
349 S1).

350 Temperature greatly affected the growth of *Coelastrella sp. D14* (Fig. S2). No growth  
351 was observed at 50°C, and the cultures were bleached on the second day of the  
352 experiment. At 4 and 40°C, we had a small increase in the microalga growth, and the  
353 cultures remained pale green, indicating they were highly stressed.

354 The effect of the absence or the use of other nitrogen sources at 16 mM (the same  
355 concentration as NaNO<sub>3</sub> is used in BG11) for the cell growth was assessed in liquid  
356 cultures. Fig. 6A shows the growth of the microalga for 10 days using alternative nitrogen  
357 sources, such as urea or ammonium. *Coelastrella sp. D14* was not able to grow without  
358 any nitrogen source, which may be because they lacked the ability to fix atmospheric  
359 nitrogen in the conditions tested. Growth in the presence of ammonium was also closer  
360 to the result observed in BG11<sub>0</sub>, despite an initial increase of the OD after 6 days.  
361 However, even though the microalgae displayed the best growth with nitrate, it seems

362 that urea could also be used as a nitrogen source, with no statistical differences and with  
363 a similar doubling time (2.52 days) compared to the control but with a longer lag phase  
364 (4 days instead of 2 days).

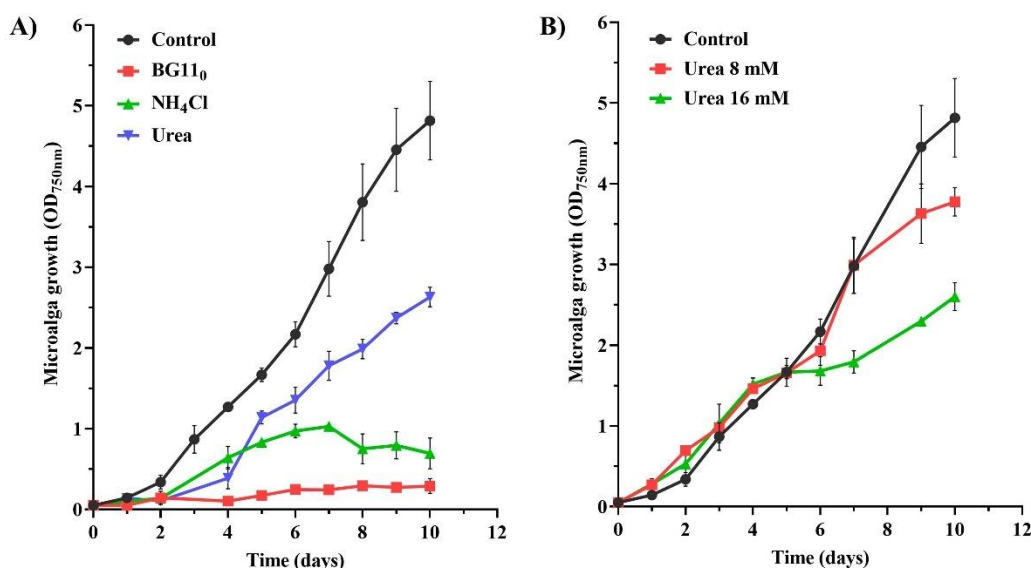

365

366 **Fig. 6. Effect of nitrogen source on 10 days growth of *Coelastrrella* sp. D14.** A)  
367 NaNO<sub>3</sub> in BG11 was substituted for urea or NH<sub>4</sub>Cl (16 mM). Alternatively, no nitrogen  
368 was added (BG11<sub>0</sub>). B) *Coelastrrella* sp. D14 tolerance to urea. Urea at 8 and 16 mM was  
369 added to BG11 complete medium. As a control, strains grown under routine conditions  
370 (BG11 pH 7.5, 30°C, 150 rpm, and continuous light 100 μE·m<sup>-2</sup>·s<sup>-1</sup>) were used. The  
371 graphs show the average OD<sub>750nm</sub> of three biological replicates together with the standard  
372 deviation (n=3).

373

374 Considering that urea was the best nitrogen source for growing the microalga (Fig. 6A)  
375 and can be abundant in different types of wastewaters, various concentrations of urea  
376 were tested to grow *Coelastrrella* sp. D14 (Fig. 6B). The microalga was sensitive to 16  
377 mM urea, while 8 mM allowed a better growth, although lower than the control after 10  
378 days of growth. These results show that even though urea cannot replace NaNO<sub>3</sub> as a  
379 nitrogen source, some strains can tolerate it.

380

### 381 3.3. Heterotrophic and Mixotrophic Growth

382 The growth of *Coelastrrella* sp. D14 was tested heterotrophically, as this strategy is  
383 widely used to increase microalgae biomass. First, it was valuated growth using glycerol  
384 and eight different sugars at 10 mM in BG11 agarized medium, complete darkness and  
385 with the photosynthesis inhibitor DCMU at 10 μM final concentration, for 30 days. The  
386 microalga was able to use glucose, fructose, and mannose as carbon source. *Coelastrrella*  
387 sp. D14 showed a weak growth using sucrose but could not grow on maltose or lactose  
388 (Fig. 7A). Erlenmeyer flask experiments were done to find accelerated mixotrophic

389 biomass growth compared to an autotrophic condition. The investigated C-sources were  
390 glucose and mannose as they contain the same amount of carbon (both are hexoses). In  
391 parallel, as control, heterotrophic growth was performed by adding DCMU to cultures  
392 with carbon source and light, to ensure the growth was due to the consumption of the  
393 sugar. Cultures without DCMU and carbon source represent the phototrophic growth.

394 As it is shown in Fig. 7B, the culture supplemented with glucose reached the highest  
395 OD<sub>750nm</sub> compared to mannose (mixotrophic) and phototrophic growth. No differences  
396 were observed between the autotrophic control and the heterotrophic growth (DCMU  
397 condition), for both carbon sources.

398

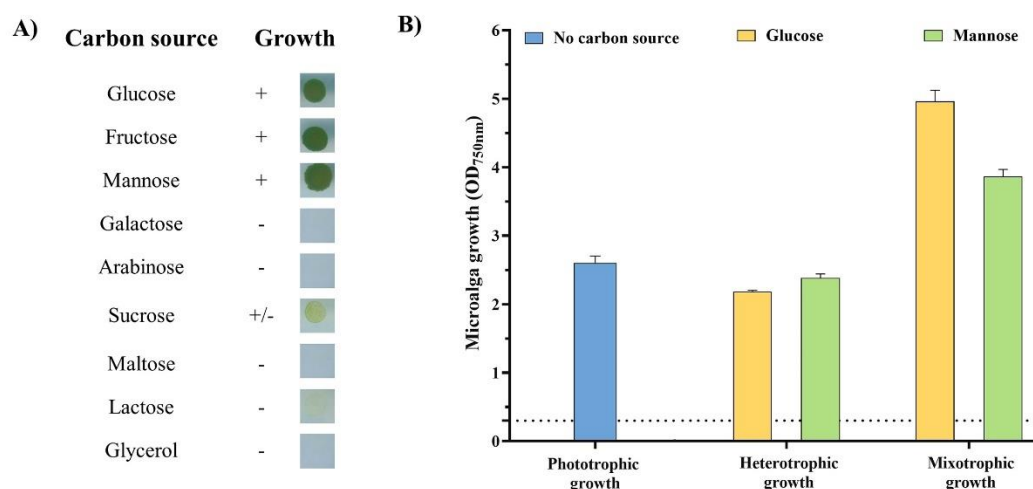

399

400 **Fig. 7. Growth of *Coelastrrella* sp. D14 using different carbon sources. A)**  
401 Heterotrophic growth of *Coelastrrella* sp. D14 in agar BG11. Microalga was grown to  
402 OD<sub>750nm</sub> = 1, 10  $\mu$ L were plated and let the microalga grow for a month. **B)** Evaluation of  
403 phototrophic, heterotrophic and mixotrophic growth in *Coelastrrella* sp. D14. For  
404 heterotrophic growth, the photosynthesis inhibitor DCMU was used at 10  $\mu$ M  
405 concentration. Sugars were added at 10 mM. The circle crossed indicates that no sugar  
406 was added. OD<sub>750nm</sub> was measured after 5 days of growth from an initial OD<sub>750nm</sub> of 0.3  
407 (dashed line). In all cases, the graphs show the average OD<sub>750nm</sub> of three biological  
408 replicates together with the standard deviation (n=3).

409

### 410 3.4. Resistance of *Coelastrrella* sp. D14 to desiccation

411 Considering that the microalga has been isolated from a solar panel, it was of interest  
412 to study its capacity to resist desiccation, so it was tested the desiccation-tolerance of  
413 *Coelastrrella* sp. D14 for 3 months, 7 months, and 1 year. As shown in Fig. 8A, in terms  
414 of ability to form colonies and grow, the rewetted samples differed little from the non-  
415 dried cultivated form, indicating that *Coelastrrella* sp. D14 was drought-resistant.  
416 *Synechocystis* sp. PCC 6803, which was used as a non-resistant strain, was unable to grow

417 after 3 months, the minimum time tested (data not shown). Just after the rewetting, all the  
418 cells exhibited the same morphology, with a thick sheath surrounding the cells (Fig. 8D).

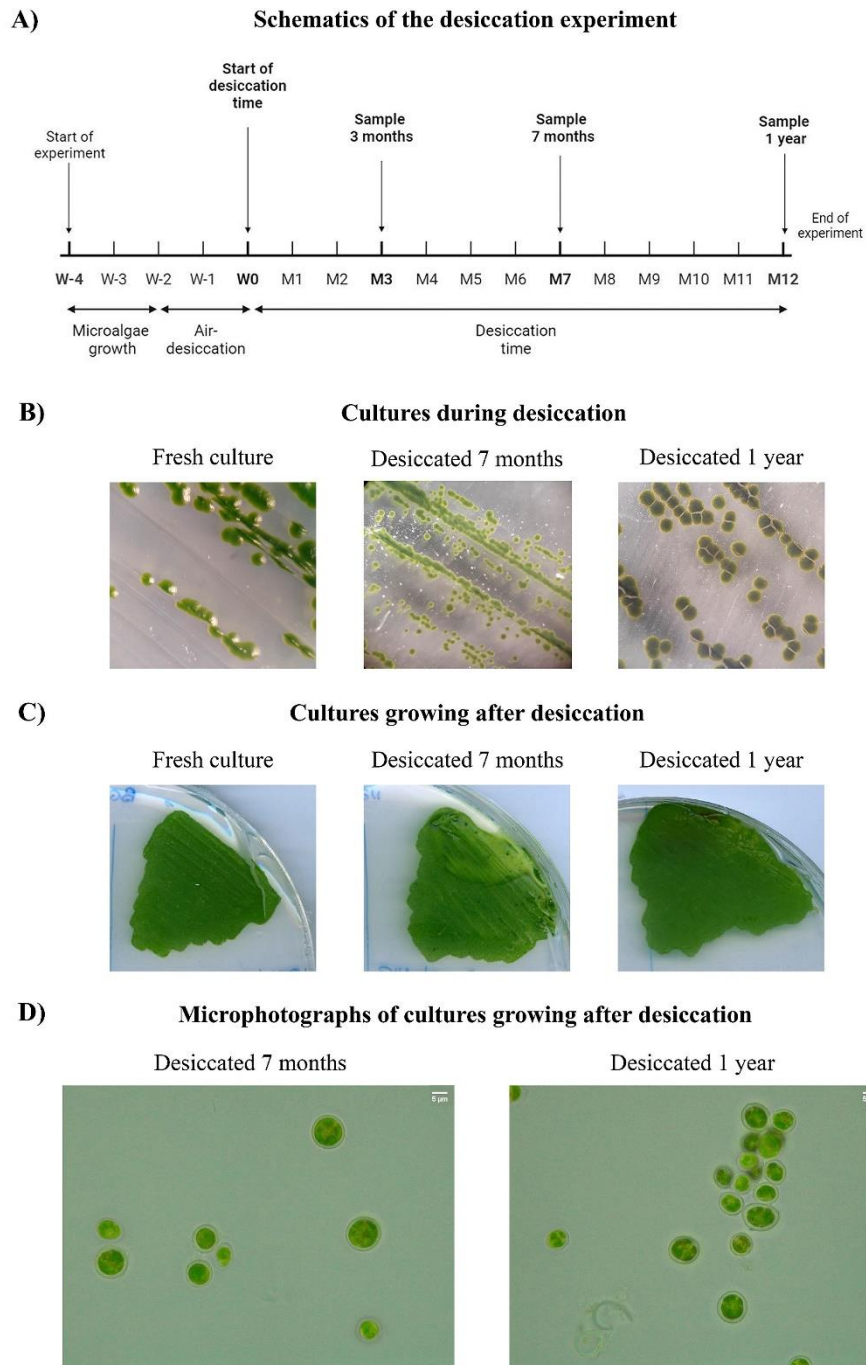

419 **Fig. 8. Long-term desiccation tolerance in *Coelastrrella* sp. D14.** A) Diagram of the  
420 desiccation process. W represents weeks, M represents months. B) Microphotographs of  
421 *Coelastrrella* sp. D14 during the experiment. C) Growth observed after 2 weeks on BG11  
422 post rewetting for 7-month and 1-year desiccated culture; a freshly streaked strain was  
423 included as a control. D) Light microscopical observation of *Coelastrrella* sp. D14 just  
424 after rewetting 7 months and 1 year-desiccated samples.

425

### 426 3.5. Evaluation of *Coelastrella* sp. D14 for wastewater treatment

427 After changing carbon and nitrogen sources in BG11 medium, the growth of  
428 *Coelastrella* sp. D14 in wastewater was evaluated, more specifically in a piggery effluent.  
429 The composition of the piggery effluent used in the trials is shown in Table 1.

430 *Coelastrella* sp. D14 was submitted to an initial screening in different PWW  
431 concentrations (Fig. 9). Experiments demonstrated that D14 could grow in this effluent  
432 at concentrations up to 30% (v/v). However, the initial lag phase becomes longer with  
433 increasing PWW concentration. At 40% PWW, no visible growth was observed during  
434 the 15 days of the experiment. Native microorganisms could be found in the medium and  
435 co-cultivated with the inoculated D14. Nevertheless, in all experiments the inoculated  
436 microalga rapidly outcompeted other organisms present in the wastewater. Thus, their  
437 impact on growth and biomass concentration was considered insignificant.

438

439

440

441

442

443

444

445

446

447

448

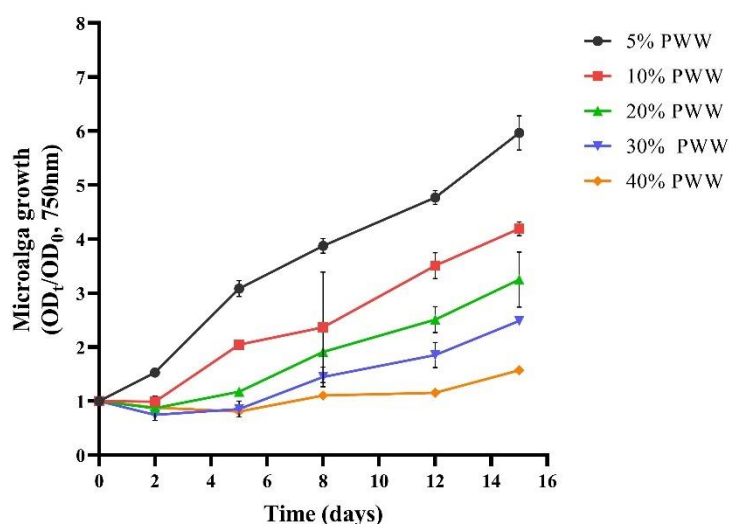

449 **Fig. 9. Growth of *Coelastrella* sp. D14 at different concentrations of piggery**  
450 **wastewater (5, 10, 20, 30, and 40% v/v).** In all cases, the graphs show the normalized  
451 value of the average OD<sub>750nm</sub> together with the standard deviation (n=2).

452

453 *Coelastrella* sp. D14 grown in synthetic medium (BG11) presents a high amount of  
454 carbohydrates (37.8%), followed by 23.2% of protein, 13.9% lipids, and 7.1% ash. When  
455 grown in PWV, it has a similar composition profile for biomass grown in 5 and 10%  
456 PWV (30-34% carbohydrates, ~21% protein, and 14-16% lipids).

457

### 458 3.6. Effect of *Coelastrella* sp. D14 as biostimulant for seed germination

459 Plant growth is affected by phytohormones, amino acids and polysaccharides, along  
460 with other nutrients, available from various sources, including microalgae. Here, the  
461 effect of *Coelastrella* sp. D14 biomass was evaluated on germination of cress seeds



462 (*Lepidium sativum*). In the biostimulant assay, a germination index (GI) of 100% was  
463 attributed to distilled water (control). Values higher than the control were considered to  
464 have a biostimulant activity (Fig. 10). The highest GI values obtained were 128%  
465 corresponding to non-disrupted biomass trials at 1 or 2 g/L on BG11 medium and 132%  
466 at 1g/L culture on 5% PWW. Cell disruption causes a significant drop, for instance, at 2  
467 g/L of D14 grown on BG11, yield dropped a 45% of the GI value with respect to the  
468 whole biomass.

469 This tendency is not seen when grown on 20% PWW. In this case, there are not so many  
470 differences between both culture and extracts GI values, not reaching in any case the GI  
471 100% value. In general, values under 100% may suggest that the microalga concentration  
472 or their biochemical composition might be excessive or toxic for *L. sativum*, negatively  
473 affecting their growth (Navarro-López et al., 2020).

474 Therefore, these results highlighted that 1 g/ L of whole algal suspension grown at 5%  
475 PWW may be the best treatment for root lengths. However, whole D14 biomass grown at  
476 10% PWW and used at 0.1%, also yielded a GI value of approximately 123%. The latter  
477 is more interesting since it uses a higher percentage of PWW to grow, lower amount of  
478 non-processed biomass, decreasing also downstream costs.

479

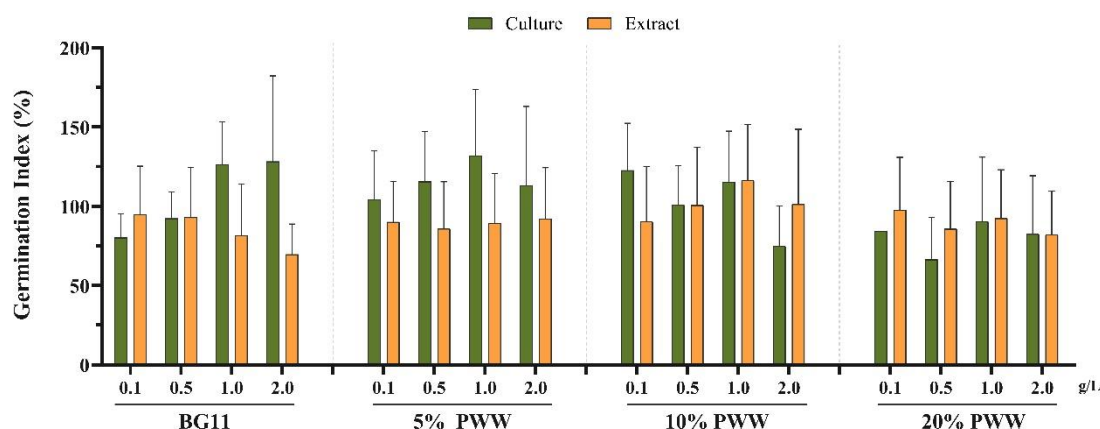

480 **Fig. 10. Germination index (%) of *Lepidium sativum* seeds using of *Coelastrrella***  
481 **sp. D14.** The graph shows the mean of germination index (GI) value, either using initial  
482 biomass or an extract of D14 growth in four different media (BG11 or BG11 containing  
483 different concentrations of piggery wastewater, PWW). GI value obtained when using  
484 distilled water as medium was considered as control (GI, 100%). Error bars indicate,  
485 standard deviation (n = 20).

486

487

#### 488 4. DISCUSSION

489 The isolate obtained from the solar panel was identified as a *Coelastrrella* sp. based on  
490 morphological features and phylogenetic analysis. The morphological features of the  
491 studied strain (single oval cells with a mean diameter of  $8.68 \pm 1.96 \mu\text{m}$ ) match those of  
492 the genus *Coelastrrella* which is characterized as unicellular and occasionally forming  
493 aggregates with vegetative cells spherical to subspherical, from 4.2–14.8  $\mu\text{m}$  in diameter  
494 (Shetty et al., 2021; Doppler et al., 2022). The phylogenetic tree was obtained using  
495 conventional loci such the nuclear 18S rRNA. This novel strain belongs to the  
496 Chlorophyceae class, Sphaeropleales order, Scenedesmaceae family, *Coelastrrella* genus.  
497 The closest relatives of D14 are *Coelastrrella* sp. isolate 3A (*Coelastrrella thermophila* var.  
498 globulina) (Boutarfa et al., 2022) and the unclassified *Coelastrrella* sp. SAG  
499 2471(GenBank: KM020087). The clade to whom D14 belongs contains in general  
500 *Coelastrrella* strains isolated from harsh environments (Ki4- from a Japanese asphalt  
501 surface in midsummer, (Kawasaki et al., 2020); *Scenedesmus* sp. JB11 from an extreme  
502 saline-alkali soil, data from NICB; *Coelastrrella* sp. isolate 3A isolated from an algerian  
503 hot spring, (Boutarfa et al., 2022)) and some of them with remarkable properties such as  
504 for producing n-6 and n-3 PUFA fatty acids (Boutarfa et al., 2022) or astaxanthin  
505 production (Kawasaki et al., 2020).

506 In the conditions tested, D14 displayed a doubling time of 2.6 days (Table S1). A novel  
507 freshwater *Coelastrrella* strain isolated in Belgium, presented a rapid growth in  
508 phototrophy, with a doubling-time of  $6.8 \pm 0.30$  h hours at a light intensity of 400  
509  $\mu\text{mol}\cdot\text{m}^{-2}\cdot\text{s}^{-1}$  and 5%  $\text{CO}_2$  (Corato et al., 2022). The specific growth rate seems to  
510 depend on dosing times of the carbonic solution added to the culture unless indoor. This  
511 causes an increase on the lipids and proteins content with major carbon source dosing  
512 times, while the carbohydrate content decreased, suggesting that the carbon source is a  
513 critical parameter for algal growth (Razooki et al., 2019). The doubling time of D14 is  
514 given without any extra C source, which could explain the low value obtained and leaves  
515 room for improvement by increasing the % of  $\text{CO}_2$  or adjusting the amount of light during  
516 growth.

517 D14 growth was assayed under several conditions as microalgal growth and biomass  
518 production depends on nutrient availability and amounts, light intensities, pH or  
519 temperature value among others. Most microalgae can grow over the range of pH values  
520 from 6.8 to 8.0, the suitable pH value depending on the microalgal species (Daneshvar et  
521 al., 2021). Concretely, a range from 5.0 to 9.0 is reported for *Coelastrrella* KKU-P1 strain  
522 (Thepsuthammarat et al., 2023). D14 grown in flasks is viable from a wide range of pH,  
523 from 4.0 to 11.0, although the highest production was obtained under a pH of 7.5 (Fig.  
524 5). *Coelastrrella* sp. strain D3–1 has been reported to resist from pH 2 to pH 11, but the  
525 experiments were performed in different conditions to this work, mainly, after the stress  
526 treatment on a diluted medium 0.2XBG11, cells were spotted on BG11 plates and grown  
527 for 7 days (Saito et al., 2023) while in this work data was taken in liquid medium with the  
528 pH corrected. Regarding the temperature, it greatly affected the growth of *Coelastrrella*  
529 sp. D14 (Fig. S2) as no growth was observed over 50 °C. On the contrary, several

530 *Coelastrella* have been reported to be able to grow on 50°C or over, for instance,  
531 *Coelastrella* sp. M60 (Nayana et al., 2022) or *Coelastrella* sp. strain D3–1 (Saito et al.,  
532 2023) resisted temperatures of up to 50 °C. However, D14 was able to resist desiccation  
533 up to one year (the maximum time tried). There are no similar experiments done with  
534 other *Coelastrella*. However, a heat-dry stress done in *Coelastrella* sp. D3–1, in which  
535 cell pellet was exposed to 42 °C for 3 h in a dryer, showed that the microalga was able to  
536 grow when later was spotted on BG11 plates (Saito et al., 2023). The xerotolerance that  
537 D14 showed is consistent with its original habitat, a solar panel, in which the water  
538 activity is logically low. It is quite possible that other *Coelastrella* isolated from solid  
539 environments such that characterized from an asphalt surface (Kawasaki et al., 2020)  
540 could display a similar behavior.

541 To enhance the biomass production, the growth of *Coelastrella* sp. D14 was investigated  
542 under both heterotrophic and mixotrophic conditions. The microalga was able to grow  
543 well heterotrophically using glucose, fructose, and mannose as carbon sources, hardly  
544 with sucrose and could not grow on maltose or lactose (Fig. 4A). In mixotrophic  
545 conditions, the growth of D14 reached the highest OD<sub>750nm</sub> when the medium was  
546 supplemented with glucose, in comparison to the use of mannose or phototrophic growth.  
547 In general, green microalgae can efficiently use glucose and fructose for growing but they  
548 usually lack sucrose transporter systems (Pang et al., 2019). However, there are some  
549 reports as *Coelastrella* sp. KKKU-P1 in which it is capable of sucrose consumption and  
550 could be used for growing on unhydrolyzed molasses as a low-cost carbon source that is  
551 rich in sugars, mainly sucrose, glucose, and fructose (Thepsuthammarat et al., 2023). D14  
552 could be subjected to adaptive laboratory evolution experiments in a future to improve its  
553 mild growth on sucrose and in this way, being able to grow on more low-cost substrates.

554 In autotrophic conditions, the absence of nitrogen in the medium, D14 was not able to  
555 survive (Fig. 7). This is expected as nitrogen is an essential component for microalgae  
556 growth, needed for macromolecules synthesis among other things and *Coelastrella* is not  
557 able to fix it, at least in the conditions tested. When NaNO<sub>3</sub> from BG11 was replaced by  
558 urea or NH<sub>4</sub>Cl (16 mM), growth was restored, although it was not as good as using the  
559 original NaNO<sub>3</sub> of BG11. Ammonium is the preferred nitrogen source for algae since it  
560 consumes less energy, as it does not require a redox reaction (Nayana et al., 2022).

561 Furthermore, the use of other cheap sources of nitrogen as urea, is convenient for reducing  
562 economical costs of the microalgae growth. Due to the ability of microalgae to grow in  
563 very diverse environments, and considering the idea of circular economy, wastewaters  
564 that are rich in nutrients can be used as a culture medium. In fact, growing microalgae in  
565 wastewater is a suitable alternative to reduce freshwater expenses and valorize residual  
566 nutrients (Ahmed et al., 2022; Sánchez-Quintero et al., 2023). (Sharma et al., 2022)  
567 enumerates several economic and growth considerations when cultivating microalgae in  
568 wastewater pointing to that appropriate strains' selection is crucial for the whole process.  
569 Therefore, it is important to count on different strains or consortiums able to bioremediate  
570 the effluents for choosing the best one for a certain valorization, for instance, using the  
571 produced biomass as plant biostimulant.

572 One kind of wastewater that causes big concern is the one from piggery industry (Ferreira  
573 et al., 2021), which is a complex effluent rich in nutrients, such as ammonia and organic  
574 matter. It causes eutrophication and toxicity of freshwater ecosystems while the deep dark  
575 color hampering photosynthesis of this medium when discharged into rivers without  
576 complete treatment (Li et al., 2019; Ferreira et al., 2021; Lee et al., 2021). On the other  
577 hand, when using piggery effluents directly in composting for agriculture, greenhouse gas  
578 emissions are generated (such as CO<sub>2</sub> and N<sub>2</sub>O) (Mohedano et al., 2019; Hu et al., 2020).  
579 For this reason, several attempts have been reported for the biological treatment of raw  
580 PWW with microalgae with different approaches. The studies at a pilot scale treating  
581 undiluted raw PWW with microalgae, also resulted in an efficient removal of nutrients  
582 and an enhancement in the clarity of wastewater (Lee et al., 2022). Another *Coelastrella*  
583 sp. isolated from an ammonia-rich environment was used for PWW treatment in a 4-day  
584 two-step process: heterotrophic plus mixotrophic steps in a narrow transparent  
585 photobioreactor (Lee et al., 2021). In these conditions, *Coelastrella* sp. could remove 99%  
586 of ammonia, 92% of chemical oxygen demand (COD), and 100% of phosphorus. In this  
587 case, the microalgal biomass was oriented towards the production of biodiesel of high  
588 quality (Su et al., 2023). This study showed that D14 can grow on piggery wastewater up  
589 to 20%. More studies must be done to evaluate how the microalga biochemical  
590 composition could be affected.

591 In this work, besides assessing the potential of *Coelastrella* sp. D14 to grow in piggery  
592 wastewater, it was explored, the use of the resulting biomass to stimulate plant growth. A  
593 bioassay was performed based on the germination index of *Lepidium sativum* seeds. The  
594 results have shown that D14 has potential as a biostimulant product acting as a  
595 gibberellin-like when growing on BG11 at 1-2 g/L or 5% PWW at 1 g/L, yielding GI  
596 values up to 132%. Other bioassays in agricultural models, such as examining root  
597 formation in mung beans and cucumbers, will be necessary to further demonstrate the  
598 auxin-like effect. On the other hand, data obtained with the whole biomass yielded higher  
599 GI values with respect to the broken cells. For other strains such as the microalga  
600 *Scenedesmus obliquus* a similar behavior has been reported: the highest GIs were  
601 obtained with the initial biomass in the absence of any pre-treatment (Navarro-López et  
602 al., 2020). For this microalga, grown on brewery effluents, a GI of 139% was obtained.

603 There are recent strategies of culturing microalgae using wastewater and CO<sub>2</sub> to produce  
604 large quantities of biomass at moderate costs while integrating local and circular economy  
605 approaches (Sánchez-Quintero et al., 2023). The fact that the microalgal D14 biomass  
606 could be used directly as a biostimulant implies a reduction in economic costs and a  
607 sustainable application, avoiding synthetic stimulants. Regarding the use of raw piggery  
608 wastewater, despite that microalgal treatment of reduces the risk of pathogens by 63%  
609 (Lee et al., 2022), recent reports highlight their persistence. To align with EU Regulation  
610 2019/1009 on plant biostimulants, it is recommended to use extracts to mitigate potential  
611 pathogen presence (Lee et al., 2022; Sánchez-Quintero et al., 2023). This needs for  
612 optimization studies on the preparation of alga extracts, as stated procedures may impact  
613 the final bioavailability of microalga compounds. These factors are influenced by the  
614 microalga species, cultivation medium, and culture state (Ferreira et al., 2018; Ferreira et

615 al., 2019). More specifically, bioactive compounds reported as biostimulants, such as  
616 phytohormones, heteropolysaccharides, amino acids, or vitamins (as reviewed by  
617 (Sánchez-Quintero et al., 2023)), are produced in various phases of growth (Tan et al.,  
618 2021). This variability could explain why extracts with the same concentration but grown  
619 in different media (resulting in distinct growth curves) do not exhibit the same  
620 biostimulant behaviour. For this reason, it could be convenient in the next future to have  
621 more studies on *Coelastrella* sp. D14 broken cells at different conditions to optimize its  
622 use as biostimulant.

623

## 624 **5. Conclusion**

625 Microalgae are a promising feedstock to produce valuable products, but it is important to  
626 isolate strains with the ability to grow in stressful conditions, to avoid contaminations and  
627 having a particular biochemical profile, and to widen their biotechnological applicability.  
628 This research highlights the potential of the strain *Coelastrella* sp. D14 for growing on  
629 low-cost resources such as PWW while removing nutrients from this effluent. If grown  
630 on 5% PWW, D14 biomass could also be used as a biostimulant allowing a more  
631 sustainable process.

632

## 633 **Author contributions**

634 All authors have contributed to the manuscript. SB and GG contributed equally to the  
635 conception and design of the study. SB, GG, and AF conducted the characterization and  
636 studies on the strain isolates and performed the studies. All authors analyzed and  
637 discussed the data. SB, GG and JMN wrote the draft of the manuscript, and AF and LG  
638 made the revisions. All authors read and approved the submitted version.

## 639 **Funding**

640 This research was supported by grants ALGATEC-CM (P2018/BAA-4532) co-  
641 financed by the European Social Fund and the European Regional Development Fund,  
642 Seth (RTI2018-095584-B-C41-42-43-44) from the Ministry of Science and Innovation of  
643 Spain and Helios (BIO2015-66960-C3-3-R) from the Ministry of Economy and  
644 Competitiveness of Spain; Programa Iberoamericano de Ciencia y Tecnología para el  
645 Desarrollo (CYTED) (through RED RENUWAL 320rt0005; Bilateral Portugal-India  
646 DRI/India/0609/2020 - Project WCAlgaeKIT+- Combination of Vertical Wetlands,  
647 Microalgae Photobioreactor and Microbial Fuel Cell (KIT) for wastewater treatment in  
648 small pig production farms; ALGAVALOR - Lisboa-01-0247-FEDER-035234,  
649 supported by Operational Programme for Competitiveness and Internationalization  
650 (COMPETE2020), by Lisbon Portugal Regional Operational Programme (Lisboa 2020)  
651 and by Algarve Regional Operational Programme (Algarve 2020) under the Portugal  
652 2020 Partnership Agreement, through the European Regional Development Fund  
653 (ERDF); Biomass and Bioenergy Research Infrastructure (BBRI)- LISBOA-01-0145-  
654 FEDER-022059, supported by Operational Programme for Competitiveness and  
655 Internationalization (PORTUGAL2020), by Lisbon Portugal Regional Operational

656 Programme (Lisboa 2020) and by North Portugal Regional Operational Programme  
657 (Norte 2020) under the Portugal 2020 Partnership Agreement, through the European  
658 Regional Development Fund (ERDF); project Performalgae, from the European Union's  
659 Horizon 2020 research and innovation programme (grant agreement n° ALG-01-0247-  
660 FEDER-069961); S.B. was supported by a fellowship from “Universidad Complutense  
661 de Madrid” (Spain). A. F. is pleased to acknowledge her PhD grant  
662 SFRH/BD/144122/2019 awarded by Fundação para a Ciência e Tecnologia.

### 663 **CRedit author contribution statement**

664 **Sara Baldanta:** Conceptualization, Investigation, Methodology, Software, Writing-  
665 Original draft preparation. **Alice Ferreira:** Investigation, Software, Visualization,  
666 Writing- Original draft preparation. **Luisa Gouveia:** Conceptualization, Visualization,  
667 Supervision, Resources, Writing- Reviewing and Editing. **Juana Maria Navarro**  
668 **Llorens:** Writing- Reviewing and Editing, Resources, Supervision. **Govinda Guevara:**  
669 Conceptualization, Investigation, Data curation, Writing- Reviewing and Editing.

### 670 **Declaration of competing Interest**

671 The authors declare that the research was conducted in the absence of any commercial or  
672 financial relationships that could be construed as a potential conflict of interest. No  
673 conflicts, informed consent, human or animal rights are applicable. All authors confirmed  
674 the manuscript’s authorship and agreed to submit it for peer review.

### 675 **Data availability**

676 The 18S rRNA data has been submitted on Genbank under accession number PP158241.  
677 Data will be made available on request.

### 678 **Acknowledgments**

679 Authors would like to thank José Luis García and Beatriz Galán (CIB-CSIC) for their  
680 technical support and Raquel Arnal (UCM) for her help in some of the studies. We are  
681 also grateful to the “Programa Iberoamericano de Ciencia y Tecnología para el  
682 Desarrollo” (CYTED) through RED RENUWAL 320rt0005. The authors would like to  
683 thank Valorgado for supplying the piggery wastewater, Graça Gomes, and Natércia Sousa  
684 (LNEG) for laboratorial assistance and maintenance of the microalgae cultures.

685

686 **Supplementary material**

687

688 **Table S1. Growth parameters of *Coelastrella* sp. D14 growing in different**  
 689 **conditions**

| Condition        | Doubling time <sup>1</sup> | Lag Phase <sup>2</sup> | OD <sub>750nm</sub> Max <sup>3</sup> |
|------------------|----------------------------|------------------------|--------------------------------------|
| Control          | 2.57 ± 0.11                | 2                      | 4.94 ± 0.70                          |
| NaCl             | 0.1 M                      | 1.99 ± 0.09            | 5.64 ± 0.36                          |
|                  | 0.25 M                     | 1.54 ± 0.08            | 5.13 ± 0.59                          |
|                  | 0.5 M                      | 1.60 ± 0.08            | 3.69 ± 0.31                          |
|                  | 1 M                        | nd                     | nd                                   |
| pH               | 4                          | 2.09 ± 0.12            | 2.22 ± 0.33                          |
|                  | 6.5                        | 2.34 ± 0.07            | 3.69 ± 0.15                          |
|                  | 9                          | 5.91 ± 0.26            | 1.67 ± 0.06                          |
|                  | 11                         | 3.39 ± 0.30            | 1.93 ± 0.11                          |
| Nitrogen sources | BG11 <sub>0</sub>          | 5.83 ± 0.75            | 0.30 ± 0.04                          |
|                  | NH <sub>4</sub> Cl         | 3.31 ± 0.34            | 1.02 ± 0.04                          |
|                  | Urea                       | 2.53 ± 0.23            | 2.63 ± 0.10                          |
| Urea             | 8 mM                       | 3.61 ± 0.23            | 4.01 ± 0.34                          |
|                  | 16 mM                      | 8.65 ± 2.27            | 2.60 ± 0.14                          |

<sup>1</sup>Mean of doubling time in days ± the standard deviation (n=3). <sup>2</sup>Lag phase expressed in days. <sup>3</sup>OD<sub>750nm</sub> maximal after 10 days of growth. nd: not determined (no growth). Conditions correspond to Figure 4, Figures 5AB Figure 6AB, respectively.

690

691

692

693

694

695

696

697

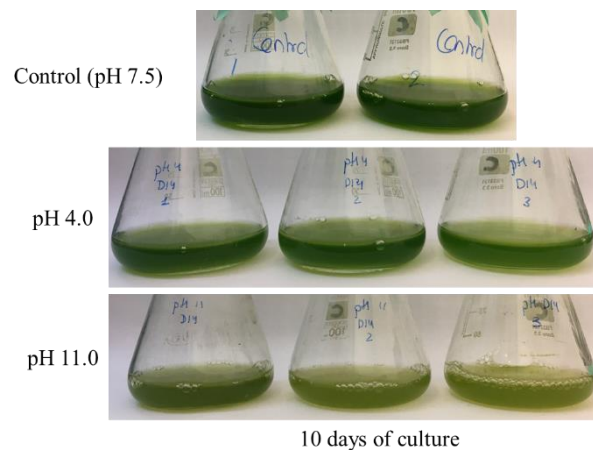

698

**Fig. S1. Growth of *Coelastrella* sp. D14 at different pH.**

699

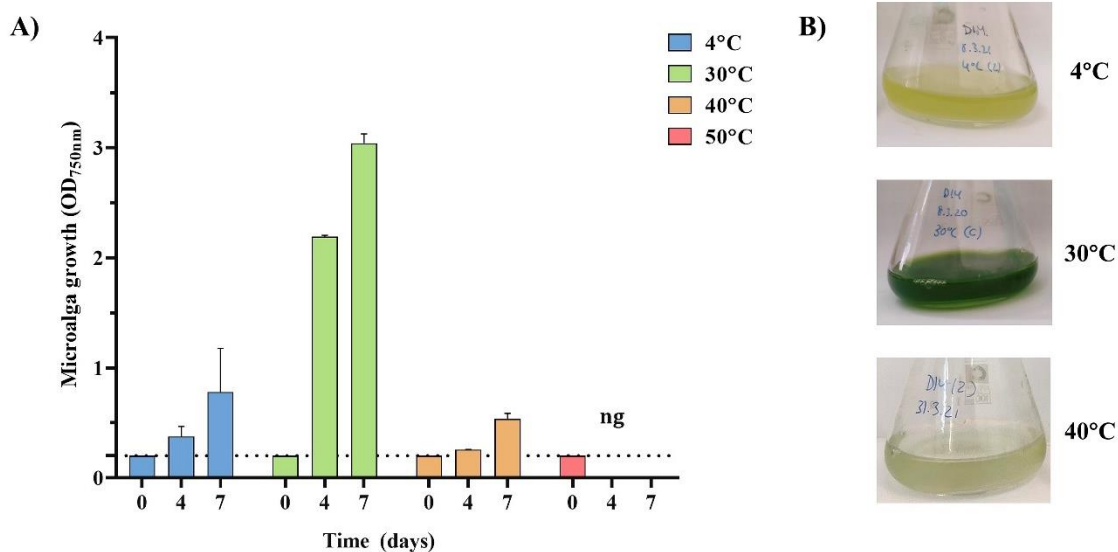

700 **Fig. S2. Growth of *Coelastrella* sp. D14 at different temperatures.** A. OD<sub>750nm</sub>  
701 reached after 10 days of growth. Initial OD<sub>750nm</sub> was 0.2 (dashed line). B. Pictures taken  
702 from different points of the experiment. ng: no growth.

703

## 704 References

- 705 Ahmed, S.F., Mofijur, M., Parisa, T.A., Islam, N., Kusumo, F., Inayat, A., Le, V.G., Badruddin, I.A.,  
706 Khan, T.M.Y., Ong, H.C., 2022. Progress and challenges of contaminate removal from  
707 wastewater using microalgae biomass. *Chemosphere*;286,131656.  
708 <https://doi.org/10.1016/j.chemosphere.2021.131656>.
- 709 Ajeng, A.A., Rosli, N.S.M., Abdullah, R., Yaacob, J.S., Qi, N.C., Loke, S.P., 2022. Resource  
710 recovery from hydroponic wastewaters using microalgae-based biorefineries: A circular  
711 bioeconomy perspective. *J. Biotechnol.*;360,11-22.  
712 <https://doi.org/10.1016/j.jbiotec.2022.10.011>.
- 713 Baldanta, S., Arnal, R., Blanco-Rivero, A., Guevara, G., Navarro Llorens, J.M., 2023. First  
714 characterization of cultivable extremophile *Chroococcidiopsis* isolates from a solar panel.  
715 *Front. Microbiol.*;14,982422. <https://doi.org/10.3389/fmicb.2023.982422>.
- 716 Boutarfa, S., Senoussi, M.M., Gonzalez-Silvera, D., López-Jiménez, J., Aboal, M., 2022. The  
717 green microalga *Coelastrella thermophila* var. *globulina* (Scenedesmaceae, Chlorophyta)  
718 isolated from an algerian hot spring as a potential source of fatty acids. *Life*  
719 (Basel);12(4)<https://doi.org/10.3390/life12040560>.
- 720 Clesceri, L.S., Greenberg, A.E., Eaton, A.D., 1988. Standard methods for the examination of  
721 water and wastewater. Washington DC., American Public Health Association.
- 722 Corato, A., Le, T.T., Baurain, D., Jacques, P., Remacle, C., Franck, F., 2022. A fast-growing  
723 pleaginous strain of *Coelastrella* capable of astaxanthin and canthaxanthin accumulation in  
724 phototrophy and heterotrophy. *Life* (Basel);12(3)<https://doi.org/10.3390/life12030334>.
- 725 Daneshvar, E., Sik Ok, Y., Tavakoli, S., Sarkar, B., Shaheen, S.M., Hong, H., Luo, Y., Rinklebe, J.,  
726 Song, H., Bhatnagar, A., 2021. Insights into upstream processing of microalgae: a review.  
727 *Bioresour. Technol.*;329,124870. <https://doi.org/10.1016/j.biortech.2021.124870>.
- 728 Doppler, P., Kriechbaum, R., Käfer, M., Kopp, J., Remias, D., Spadiut, O., 2022. *Coelastrella*  
729 *terrestris* for adonixanthin production: physiological characterization and evaluation of



- 730 secondary carotenoid productivity. Mar Drugs;20(3).  
731 <https://doi.org/10.3390/md20030175>.
- 732 Dorado-Morales, P., Vilanova, C., Pereto, J., Codoner, F.M., Ramon, D., Porcar, M., 2016. A  
733 highly diverse, desert-like microbial biocenosis on solar panels in a Mediterranean city. Sci.  
734 Rep.;6,29235. <https://doi.org/10.1038/srep29235>.
- 735 Dubois, M., Gilles, K.A., Hamilton, J.K., Rebers, P.T., Smith, F., 1956. Colorimetric method for  
736 determination of sugars and related substances. Anal. Chem.;28(3),350-356.
- 737 Elisabeth, B., Rayen, F., Behnam, T., 2021. Microalgae culture quality indicators: a review.  
738 Crit. Rev. Biotechnol.;41(4),457-473. <https://doi.org/10.1080/07388551.2020.1854672>.
- 739 Ferreira, A., Melkonyan, L., Carapinha, S., Ribeiro, B., Figueiredo, D., Avetisova, G., Gouveia,  
740 L., 2021. Biostimulant and biopesticide potential of microalgae growing in piggery  
741 wastewater. Environ. Adv.;4,100062. <https://doi.org/10.1016/j.envadv.2021.100062>.
- 742 Ferreira, A., Figueiredo, D., Ferreira, F., Ribeiro, B., Reis, A., da Silva, T.L., Gouveia, L., 2022.  
743 Impact of high-pressure homogenization on the cell integrity of *Tetradismus obliquus* and  
744 seed germination. Molecules;27(7). <https://doi.org/10.3390/molecules27072275>.
- 745 Ferreira, A., Ribeiro, B., Marques, P.A.S.S., Ferreira, A.F., Dias, A.P., Pinheiro, H.M., Reis, A.,  
746 Gouveia, L., 2017. *Scenedesmus obliquus* mediated brewery wastewater remediation and  
747 CO2 biofixation for green energy purposes. J. Clean Prod.;165,1316-1327.
- 748 Ferreira, A., Marques, P., Ribeiro, B., Assemany, P., de Mendonca, H.V., Barata, A., Oliveira,  
749 A.C., Reis, A., Pinheiro, H.M., Gouveia, L., 2018. Combining biotechnology with circular  
750 bioeconomy: From poultry, swine, cattle, brewery, dairy and urban wastewaters to  
751 biohydrogen. Environ Res;164,32-38. <https://doi.org/10.1016/j.envres.2018.02.007>.
- 752 Ferreira, A., Ribeiro, B., Ferreira, A.F., Tavares, M.L.A., Vladić, J., Vidovic, S.S., Cvetković, D.D.,  
753 Melkonyan, L.H., Avetisova, G.E., Goginyan, V., Gouveia, L., 2019. *Scenedesmus obliquus*  
754 microalga-based biorefinery – from brewery effluent to bioactive compounds, biofuels and  
755 biofertilizers – aiming at a circular bioeconomy. Biofuels;13.  
756 <https://doi.org/10.1002/bbb.2032>.
- 757 García, D., Posadas, E., Blanco, S., Ación, G., García-Encina, P., Bolado, S., Muñoz, R., 2018.  
758 Evaluation of the dynamics of microalgae population structure and process performance  
759 during piggery wastewater treatment in algal-bacterial photobioreactors. Bioresour.  
760 Technol.;248(Pt B),120-126. <https://doi.org/10.1016/j.biortech.2017.06.079>.
- 761 Goecke, F., Noda, J., Paliocha, M., Gislerød, H.R., 2020. Revision of *Coelastrella*  
762 (*Scenedesmaceae*, Chlorophyta) and first register of this green coccoid microalga for  
763 continental Norway. World J. Microbiol. Biotechnol.;36(10),149.  
764 <https://doi.org/10.1007/s11274-020-02897-0>.
- 765 González-Pérez, B.K., Rivas-Castillo, A.M., Valdez-Calderón, A., Gayosso-Morales, M.A., 2021.  
766 Microalgae as biostimulants: a new approach in agriculture. World J. Microbiol.  
767 Biotechnol.;38(1),4. <https://doi.org/10.1007/s11274-021-03192-2>.
- 768 González López, C.V., García Mdel, C., Fernández, F.G., Bustos, C.S., Chisti, Y., Sevilla, J.M.,  
769 2010. Protein measurements of microalgal and cyanobacterial biomass. Bioresour.  
770 Technol.;101(19),7587-7591. <https://doi.org/10.1016/j.biortech.2010.04.077>.
- 771 Hoebler, C., Barry, J.L., David, A., Delort-Laval, J., 1989. Rapid acid hydrolysis of plant cell  
772 wall polysaccharides and simplified quantitative determination of their neutral  
773 monosaccharides by gas-liquid chromatography. J. Agric. Food Chem.;37(2),360-367.  
774 <https://doi.org/10.1021/jf00086a020>.

- 775 Hu, H., Li, X., Wu, S., Yang, C., 2020. Sustainable livestock wastewater treatment via  
776 phytoremediation: Current status and future perspectives. *Bioresour.*  
777 *Technol.*;315,123809. <https://doi.org/10.1016/j.biortech.2020.123809>.
- 778 Hussain, F., Shah, S.Z., Ahmad, H., Abubshait, S.A., Abubshait, H.A., Laref, A., Manikandan, A.,  
779 Kusuma, H.S., Iqbal, M., 2021. Microalgae an ecofriendly and sustainable wastewater  
780 treatment option: Biomass application in biofuel and bio-fertilizer production. A review.  
781 *Renew. Sust. Energ. Rev.*;137,110603. <https://doi.org/10.1016/j.rser.2020.110603>.
- 782 John, D.M., 2002. Filamentous and plantlike green algae. In: Wehr J, Sheath R, Kociolek JP  
783 editors. *Freshwater Algae of North America, Ecology and Classification*. Cambridge, MA,  
784 USA: Academic Press. p. 311–352.
- 785 Kawasaki, S., Yoshida, R., Ohkoshi, K., Toyoshima, H., 2020. *Coelastrella astaxanthina* sp. nov.  
786 (Sphaeropleales, Chlorophyceae), a novel microalga isolated from an asphalt surface in  
787 midsummer in Japan. *Phycological Res.*;68(2),107-114.  
788 <https://doi.org/10.1111/pre.12412>.
- 789 Khanra, A., Vasistha, S., Kumar, S., Rai, M.P., 2021. Cultivation of microalgae on unhydrolysed  
790 waste molasses syrup using mass cultivation strategy for improved biodiesel.  
791 *Biotech.*;11(6),287. <https://doi.org/10.1007/s13205-021-02823-7>.
- 792 Lee, S.-A., Kim, M., Kim, H.-S., Ahn, C.-Y., 2022. Extra benefit of microalgae in raw piggery  
793 wastewater treatment: pathogen reduction. *Microbiome*;10(1),142.  
794 <https://doi.org/10.1186/s40168-022-01339-3>.
- 795 Lee, S.A., Ko, S.R., Lee, N., Lee, J.W., Le, V.V., Oh, H.M., Ahn, C.Y., 2021. Two-step microalgal  
796 (*Coelastrella* sp.) treatment of raw piggery wastewater resulting in higher lipid and  
797 triacylglycerol levels for possible production of higher-quality biodiesel. *Bioresour.*  
798 *Technol.*;332,125081. <https://doi.org/10.1016/j.biortech.2021.125081>.
- 799 Li, X., Li, W., Zhai, J., Wei, H., Wang, Q., 2019. Effect of ammonium nitrogen on microalgal  
800 growth, biochemical composition and photosynthetic performance in mixotrophic  
801 cultivation. *Bioresour. Technol.*;273,368-376.  
802 <https://doi.org/10.1016/j.biortech.2018.11.042>.
- 803 Maltsev, Y., Krivova, Z., Maltseva, S., Maltseva, K., Gorshkova, E., Kulikovskiy, M., 2021. Lipid  
804 accumulation by *Coelastrella multistriata* (Scenedesmaceae, Sphaeropleales) during  
805 nitrogen and phosphorus starvation. *Sci. Rep.*;11(1),19818.  
806 <https://doi.org/10.1038/s41598-021-99376-9>.
- 807 Mohedano, R.A., Tonon, G., Costa, R.H.R., Pelissari, C., Belli Filho, P., 2019. Does duckweed  
808 ponds used for wastewater treatment emit or sequester greenhouse gases? *Sci. Total.*  
809 *Environ.*;691,1043-1050. <https://doi.org/10.1016/j.scitotenv.2019.07.169>.
- 810 Navarro-López, E., Ruiz-Nieto, A., Ferreira, A., Ación, F.G., Gouveia, L., 2020. Biostimulant  
811 potential of *Scenedesmus obliquus* grown in brewery wastewater. *Molecules*;25(3).  
812 <https://doi.org/10.3390/molecules25030664>.
- 813 Nayana, K., Sudhakar, M.P., Arunkumar, K., 2022. Biorefinery potential of *Coelastrella*  
814 biomass for fuel and bioproducts—a review. *Biomass Convers. Biorefin.*  
815 <https://doi.org/10.1007/s13399-022-02519-9>.
- 816 Pang, N., Gu, X., Chen, S., Kirchoff, H., Lei, H., Roje, S., 2019. Exploiting mixotrophy for  
817 improving productivities of biomass and co-products of microalgae. *Renew. Sust. Energ.*  
818 *Rev.*;112,450-460. <https://doi.org/10.1016/j.rser.2019.06.001>.
- 819 Porcar, M., Louie, K.B., Kosina, S.M., Van Goethem, M.W., Bowen, B.P., Tanner, K., Northen,  
820 T.R., 2018. Microbial ecology on solar panels in Berkeley, CA, United States. *Front.*  
821 *Microbiol.*;9,3043. <https://doi.org/10.3389/fmicb.2018.03043>.

- 822 Posadas, E., Alcántara, C., García-Encina, P.A., Gouveia, L., Guieysse, B., Norvill, Z., Ación, F.G.,  
823 Markou, G., Congestri, R., Koreiviene, J., Muñoz, R., 2017. Microalgae cultivation in  
824 wastewater. In: González-Fernández C, Muñoz R editors. Microalgae-Based Biofuels and  
825 Bioproducts: Woodhead Publishing. p. 67-91.
- 826 Procházková, G., Brányiková, I., Zachleder, V., Brányik, T., 2014. Effect of nutrient supply  
827 status on biomass composition of eukaryotic green microalgae. J. Appl. Phycol.;26(3),1359-  
828 1377. <https://doi.org/10.1007/s10811-013-0154-9>.
- 829 Rasband, W.S., 1997. ImageJ. Bethesda, Maryland, USA: U. S. National Institutes of Health.  
830 vol. 1997-2018.
- 831 Razooki, Z.H., Abed, I.J., Al-Mashhadani, M.K.H., 2019. Effect of the aqueous carbon source on  
832 growth rate of the microalgae *Coelastrella* sp. MH923012. Plant Arch.;19,1420-1421.
- 833 Rippka, R., Deruelles, J., Waterbury, J.B., Herdman, M., Stanier, R.Y., 1979. Generic  
834 assignments, strain histories and properties of pure cultures of cyanobacteria.  
835 Microbiol.;111(1),1-61. <https://doi.org/10.1099/00221287-111-1-1>.
- 836 Rizwan, M., Mujtaba, G., Memon, S.A., Lee, K., Rashid, N., 2018. Exploring the potential of  
837 microalgae for new biotechnology applications and beyond: A review. Renew. Sust. Energ.  
838 Rev.;92(C),394-404. <https://doi.org/10.1016/j.rser.2018.04.03>.
- 839 Saito, M., Watanabe, H., Sasaki, M., Ookubo, M., Yarita, T., Shiraiwa, M., Asayama, M., 2023.  
840 Coproduction of lipids and carotenoids by the novel green alga *Coelastrella* sp. depending  
841 on cultivation conditions. Biotechnol. Rep.;37,e00769.  
842 <https://doi.org/10.1016/j.btre.2022.e00769>.
- 843 Sánchez-Quintero, A., Fernandes, S.C.M., Beigbeder, J.B., 2023. Overview of microalgae and  
844 cyanobacteria-based biostimulants produced from wastewater and CO(2) streams towards  
845 sustainable agriculture: A review. Microbiol. Res.;277,127505.  
846 <https://doi.org/10.1016/j.micres.2023.127505>.
- 847 Sharma, R., Mishra, A., Pant, D., Malaviya, P., 2022. Recent advances in microalgae-based  
848 remediation of industrial and non-industrial wastewaters with simultaneous recovery of  
849 value-added products. Bioresour. Technol.;344,126129.  
850 <https://doi.org/10.1016/j.biortech.2021.126129>.
- 851 Shetty, P., Farkas, A., Pap, B., Hupp, B., Ördög, V., Bíró, T., Varga, T., Maróti, G., 2021.  
852 Comparative and phylogenomic analysis of nuclear and organelle genes in cryptic  
853 *Coelastrella vacuolata* MACC-549 green algae. Algal Res.;58,102380.  
854 <https://doi.org/10.1016/j.algal.2021.102380>.
- 855 Singh, P., Gupta, S.K., Guldhe, A., Rawat, I., Bux, F., 2015. Microalgae isolation and basic  
856 culturing techniques. Amsterdam, The Netherlands, Elsevier.
- 857 Su, M., Bastiaens, L., Verspreet, J., Hayes, M., 2023. Applications of microalgae in foods,  
858 pharma and feeds and their use as fertilizers and biostimulants: legislation and regulatory  
859 aspects for consideration. Foods;12(20). <https://doi.org/10.3390/foods12203878>.
- 860 Sudhakar, M.P., Kumar, B.R., Mathimani, T., Arunkumar, K., 2019. A review on bioenergy and  
861 bioactive compounds from microalgae and macroalgae-sustainable energy perspective. J.  
862 Clean Prod.;228,1320-1333. <https://doi.org/10.1016/j.jclepro.2019.04.287>.
- 863 Tan, C.-Y., Dodd, I.C., Chen, J.E., Phang, S.-M., Chin, C.F., Yow, Y.-Y., Ratnayeke, S., 2021.  
864 Regulation of algal and cyanobacterial auxin production, physiology, and application in  
865 agriculture: an overview. J. Appl. Phycol.;33,2995-3023. <https://doi.org/10.1007/s10811-021-02475-3>.
- 866

- 867 Tang, D.Y.Y., Khoo, K.S., Chew, K.W., Tao, Y., Ho, S.H., Show, P.L., 2020. Potential utilization of  
868 bioproducts from microalgae for the quality enhancement of natural products. *Bioresour.*  
869 *Technol.*;304,122997. <https://doi.org/10.1016/j.biortech.2020.122997>.
- 870 Tanner, K., Martí, J.M., Belliure, J., Fernández-Méndez, M., Molina-Menor, E., Peretó, J., Porcar,  
871 M., 2018. Polar solar panels: Arctic and Antarctic microbiomes display similar taxonomic  
872 profiles. *Environ. Microbiol. Rep.*;10(1),75-79.
- 873 Thepsuthammarat, K., Reungsang, A., Plangklang, P., 2023. Microalga *Coelastrella* sp.  
874 cultivation on unhydrolyzed molasses-based medium towards the optimization of  
875 conditions for growth and biomass production under mixotrophic cultivation. *Molecules.*  
876 vol. 28.
- 877 Viegas, C., Gouveia, L., Gonçalves, M., 2021. Aquaculture wastewater treatment through  
878 microalgal. Biomass potential applications on animal feed, agriculture, and energy. *J.*  
879 *Environ. Manage.*;286,112187. <https://doi.org/10.1016/j.jenvman.2021.112187>.
- 880 Wang, Q., Song, H., Liu, X., Liu, B., Hu, Z., Liu, G., 2019. Morphology and molecular phylogeny  
881 of coccoid green algae *Coelastrella sensu lato* (Scenedesmaceae, Sphaeropeales), including  
882 the description of three new species and two new varieties. *J. Phycol.*;55(6),1290-1305.  
883 <https://doi.org/10.1111/jpy.12915>.
- 884 Zaytseva, A., Chekanov, K., Zaytsev, P., Bakhareva, D., Gorelova, O., Kochkin, D., Lobakova, E.,  
885 2021. Sunscreen effect exerted by secondary carotenoids and mycosporine-like amino acids  
886 in the aeroterrestrial chlorophyte *Coelastrella rubescens* under high light and UV-A  
887 irradiation. *Plants (Basel)*;10(12). <https://doi.org/10.3390/plants10122601>.
- 888 Zucconi, F., Forte, M., Monaco, A., De Bertoldi, M., 1981. Biological evaluation of compost  
889 maturity. *BioCycle*;22,27-29.
- 890
